# Supplementary material for: Modulation of Cellular MicroRNA by HIV-1 in Burkitt Lymphoma Cells—A Pathway to Promoting Oncogenesis
Source: MDPI journal article supplement (doi:10.3390/genes12091302), 2021-08-24
Supplement: s1 [file s1]

**Supplementary Table 1.1: Summary of miRNAs reported to be deregulated in Diffuse Large B-cell lymphoma**

| Subtype                         | Upregulated miRNAs                                                                                                                                                                                                                                                                                                                                                                                                               | Downregulated miRNAs | Reference                      |
|---------------------------------|----------------------------------------------------------------------------------------------------------------------------------------------------------------------------------------------------------------------------------------------------------------------------------------------------------------------------------------------------------------------------------------------------------------------------------|----------------------|--------------------------------|
| Germinal Centre B-cell like     | miR-10398-3p, NOVEL00260M, NOVELM00010M, miR-10b-5p, miR-423-3p, miR-301a-5p, miR-598, miR-181a-5p, miR-30e-3p, miR-744-5p, miR-4746-5p, miR-1270, miR-3074-5p, miR-589-3p, miR-151a-3p, miR-331-3p, miR-3934-3p, miR-589-5p, miR-210, miR-138-1-3p, miR-28-5p, miR-339-3p, miR-196b-5p, miR-151b, miR-129-2-3p, miR-664a-3p, miR-28-3p, miR-582-3p, miR-3681-5p, miR-129-1-3p, miR-582-5p, miR-138-5p, miR-129-5p, miR-3150b-3p | *                    | Lim <i>et al.</i> , 2015       |
|                                 | *                                                                                                                                                                                                                                                                                                                                                                                                                                | miR-28               | Schneider <i>et al.</i> , 2014 |
|                                 | miR-18a                                                                                                                                                                                                                                                                                                                                                                                                                          | *                    | Alencar <i>et al.</i> , 2011   |
|                                 | miR-17, miR-18a, miR-19a, miR-20a, miR-19b, miR-92a                                                                                                                                                                                                                                                                                                                                                                              | *                    | Fassina <i>et al.</i> , 2012   |
|                                 | miR-17-5p, miR-150, miR-145, miR-328                                                                                                                                                                                                                                                                                                                                                                                             | *                    | Roehle <i>et al.</i> , 2008    |
|                                 | miR-17/92, miR-181a, miR-221                                                                                                                                                                                                                                                                                                                                                                                                     | *                    | Lawrie <i>et al.</i> , 2008    |
|                                 | miR-17, miR-19b, miR-20a                                                                                                                                                                                                                                                                                                                                                                                                         | *                    | Culpin <i>et al.</i> , 2010    |
|                                 | miR-28-3p, miR-28-5p, miR-129-3p, miR-589, miR-331-5p, miR-597                                                                                                                                                                                                                                                                                                                                                                   | *                    | Iqbal <i>et al.</i> , 2015     |
| Non-Germinal Centre B-cell like | miR-10397-5p, NOVELM00288M, miR-155-3p, miR-222-5p, miR-148a-5p, miR-222-3p, miR-625-3p, miR-363-3p, miR-30d-3p, miR-30b-3p, miR-221-3p, miR-92a-1-5p, miR-21-3p, miR-155-5p, miR-625-5p, miR-29b-1-5p, miR-20a-5p, miR-17-5p, miR-106a-5p, miR-503-5p, miR-424-5p, miR-302a, miR-10b-5p                                                                                                                                         | *                    | Lim <i>et al.</i> , 2015       |
|                                 | miR-181, miR-222                                                                                                                                                                                                                                                                                                                                                                                                                 | *                    | Alencar <i>et al.</i> , 2011   |
|                                 | *                                                                                                                                                                                                                                                                                                                                                                                                                                | miR-34a              | Craig <i>et al.</i> , 2012     |
|                                 | miR-155, miR-29b, miR-146a, miR-365, miR-30b, miR-26b, miR-374, let-7f, miR-9, miR-9-3p, miR-34b                                                                                                                                                                                                                                                                                                                                 | *                    | Di Lisio <i>et al.</i> , 2012  |
|                                 | miR-23a, miR-24-2, miR-27a                                                                                                                                                                                                                                                                                                                                                                                                       | *                    | Kong <i>et al.</i> , 2010      |
|                                 | miR-150, miR-145, miR-328                                                                                                                                                                                                                                                                                                                                                                                                        | *                    | Roehle <i>et al.</i> , 2008    |
|                                 | miR-155, miR-21, miR-210, miR-221                                                                                                                                                                                                                                                                                                                                                                                                | *                    | Lenz <i>et al.</i> , 2008      |
|                                 | miR-155, miR-21, miR-22, miR-146a, miR-146b, miR-500, miR-363, miR-574-3p, miR-547-5p, miR-222                                                                                                                                                                                                                                                                                                                                   | *                    | Malumbres <i>et al.</i> , 2009 |
|                                 | miR-29a, miR-92a, miR-106a, miR-720, miR-1260, miR-1280                                                                                                                                                                                                                                                                                                                                                                          | *                    | Culpin <i>et al.</i> , 2010    |
|                                 | miR-155, miR-542-3p                                                                                                                                                                                                                                                                                                                                                                                                              | *                    | Iqbal <i>et al.</i> , 2015     |

\* no miRNAs were reported as downregulated/upregulated in this study (miR-microRNA)

**Table 1.2: Summary of miRNAs reported to be deregulated in Burkitt lymphoma**

| Upregulated miRNAs                                                                                                                                                                                                                         | Downregulated miRNAs                                                                                                                                                                                                                                                                                                    | Reference                     |
|--------------------------------------------------------------------------------------------------------------------------------------------------------------------------------------------------------------------------------------------|-------------------------------------------------------------------------------------------------------------------------------------------------------------------------------------------------------------------------------------------------------------------------------------------------------------------------|-------------------------------|
| miR-371, miR-185, miR-93, miR-326, miR-339, miR-485, miR-193a, miR-448, miR-202, miR-483, miR-26a, miR-328, miR-192, miR-429, miR-324, miR-340, miR-105, miR-124                                                                           | miR-221, miR-30a, miR-146a, miR-146b, miR-26b, miR-23a, miR-30d, miR-107, miR-103, miR-222, miR-26a, miR-30a, miR-142, miR-23b, miR-342, miR-29b, miR-34b, miR-9                                                                                                                                                        | Lenze <i>et al.</i> , 2011    |
| miR-19a, miR-18a, miR-19b, miR-20a, miR-17-3p, miR-17-5p, miR-92, miR-106a, miR-130b, miR-128b, miR-7, miR-206, miR-370, miR-494, miR-148a, miR-20b                                                                                        | miR-210, let-7e, miR-215, miR-144, miR-451, miR-101, miR-125b, miR-139, miR-140, miR-142-3p, miR-146a, miR-15a, miR-150, miR-16, miR-195, miR-22, miR-223, miR-23a, miR-23b, miR-24, miR-26a, miR-26b, miR-29a, miR-29b, miR-29c, miR-30c, miR-30e-3p, miR-30e-5p, miR-34a, miR-99b, let-7a, miR-155, miR-196a, miR-342 | Robertus <i>et al.</i> , 2010 |
| miR-17-5p, miR-20a, miR-9-3p                                                                                                                                                                                                               | *                                                                                                                                                                                                                                                                                                                       | Onnis <i>et al.</i> , 2010    |
| miR-210, miR-494, miR-575, miR-202, miR-801, miR-370, miR-765, miR-188, miR-296, miR-560, miR-663, miR-181, miR-574, miR-197, miR-92, miR-20b, miR-20a, miR-17-5p, miR-106, miR-93, miR-422, miR-17-3p, miR-18a, miR-130, miR-19b, miR-19a | miR-29b, let-7d, miR-155, miR-15a, let-7e, miR-23b, miR-768-5p, miR-148a, miR-331, miR-27b, miR-28, miR-363, miR-98, let-7a, let-7f, let-7g, miR-29a                                                                                                                                                                    | Bueno <i>et al.</i> , 2011    |

\* no miRNAs were reported as downregulated in this study  
miR - microRNA

**Table 1.3. MiRNAs (n = 188; 192a format) for microarray profiling, spotted in duplicate, including four controls.**

|              |             |             |             |             |             |             |             |             |             |            |              |              |            |             |            |             |             |             |             |             |             |             |             |
|--------------|-------------|-------------|-------------|-------------|-------------|-------------|-------------|-------------|-------------|------------|--------------|--------------|------------|-------------|------------|-------------|-------------|-------------|-------------|-------------|-------------|-------------|-------------|
| let-7a-2-3p  | let-7a-1-3p | let-7a-5p   | let-7b-5p   | let-7b-3p   | let-7c-5p   | let-7d-5p   | let-7e-5p   | let-7e-3p   | let-7f-5p   | U6         | let-7f-1-3p  | let-7g-5p    | let-7i-5p  | miR-100-5p  | miR-100-3p | miR-101-3p  | miR-103a-3p | miR-105-5p  | miR-105-3p  | miR-106a-5p | miR-106a-3p | miR-106b-5p | miR-106b-3p |
| let-7a-2-3p  | let-7a-1-3p | let-7a-5p   | let-7b-5p   | let-7b-3p   | let-7c-5p   | let-7d-5p   | let-7e-5p   | let-7e-3p   | let-7f-5p   | U6         | let-7f-1-3p  | let-7g-5p    | let-7i-5p  | miR-100-5p  | miR-100-3p | miR-101-3p  | miR-103a-3p | miR-105-5p  | miR-105-3p  | miR-106a-5p | miR-106a-3p | miR-106b-5p | miR-106b-3p |
| miR-107      | miR-124-5p  | miR-125b-5p | miR-126-3p  | miR-126-5p  | miR-127-3p  | miR-130b-3p | miR-132-3p  | miR-133a-3p | miR-138-5p  | miR-140-3p | miR-141-3p   | miR-142-3p   | U44        | miR-143-3p  | miR-143-5p | miR-145-3p  | miR-145-5p  | miR-146a-3p | miR-146b-3p | miR-146b-5p | miR-148a-3p | miR-148a-5p | miR-149-5p  |
| miR-107      | miR-124-5p  | miR-125b-5p | miR-126-3p  | miR-126-5p  | miR-127-3p  | miR-130b-3p | miR-132-3p  | miR-133a-3p | miR-138-5p  | miR-140-3p | miR-141-3p   | miR-142-3p   | U44        | miR-143-3p  | miR-143-5p | miR-145-3p  | miR-145-5p  | miR-146a-3p | miR-146b-3p | miR-146b-5p | miR-148a-3p | miR-148a-5p | miR-149-5p  |
| miR-150-5p   | miR-150-3p  | miR-151a-3p | miR-155-5p  | miR-155-3p  | miR-15a-3p  | miR-15b-5p  | U48         | miR-17-5p   | miR-17-3p   | miR-18a-5p | miR-18b-5p   | miR-185-5p   | miR-188-5p | miR-191-5p  | miR-192-5p | miR-193a-5p | miR-194-5p  | miR-194-3p  | miR-195-5p  | miR-195-3p  | miR-196a-5p | miR-196a-3p | miR-196b-5p |
| miR-150-5p   | miR-150-3p  | miR-151a-3p | miR-155-5p  | miR-155-3p  | miR-15a-3p  | miR-15b-5p  | U48         | miR-17-5p   | miR-17-3p   | miR-18a-5p | miR-18b-5p   | miR-185-5p   | miR-188-5p | miR-191-5p  | miR-192-5p | miR-193a-5p | miR-194-5p  | miR-194-3p  | miR-195-5p  | miR-195-3p  | miR-196a-5p | miR-196a-3p | miR-196b-5p |
| miR-197      | miR-199a-3p | miR-199a-3p | miR-199a-3p | U6          | miR-20b-5p  | miR-200c-3p | miR-202-5p  | miR-205-5p  | miR-21-5p   | miR-210-3p | miR-214-3p   | miR-215-5p   | miR-218-5p | miR-22-3p   | miR-221-3p | miR-222-3p  | miR-223-5p  | miR-224-5p  | miR-23a-3p  | miR-23b-3p  | miR-24-3p   | miR-25-3p   | miR-26a-5p  |
| miR-197      | miR-199a-3p | miR-199a-3p | miR-199a-3p | U6          | miR-20b-5p  | miR-200c-3p | miR-202-5p  | miR-205-5p  | miR-21-5p   | miR-210-3p | miR-214-3p   | miR-215-5p   | miR-218-5p | miR-22-3p   | miR-221-3p | miR-222-3p  | miR-223-5p  | miR-224-5p  | miR-23a-3p  | miR-23b-3p  | miR-24-3p   | miR-25-3p   | miR-26a-5p  |
| miR-26a-1-3p | miR-26b-5p  | miR-26b-3p  | miR-27a-3p  | miR-27b-3p  | miR-28-3p   | miR-29a-3p  | miR-29b-3p  | miR-29c-3p  | miR-296-3p  | miR-30a-3p | miR-30a-5p   | miR-30b-3p   | miR-30c-5p | miR-30d-5p  | miR-30e-3p | U44         | miR-301a-3p | miR-31-5p   | miR-32-5p   | miR-320a    | miR-324-3p  | miR-324-5p  | miR-326     |
| miR-26a-1-3p | miR-26b-5p  | miR-26b-3p  | miR-27a-3p  | miR-27b-3p  | miR-28-3p   | miR-29a-3p  | miR-29b-3p  | miR-29c-3p  | miR-296-3p  | miR-30a-3p | miR-30a-5p   | miR-30b-3p   | miR-30c-5p | miR-30d-5p  | miR-30e-3p | U44         | miR-301a-3p | miR-31-5p   | miR-32-5p   | miR-320a    | miR-324-3p  | miR-324-5p  | miR-326     |
| miR-328-3p   | miR-331-3p  | miR-339-3p  | miR-339-5p  | miR-340-5p  | miR-342-5p  | miR-342-3p  | miR-345-5p  | miR-34a-5p  | miR-34b-5p  | miR-361-5p | miR-363-3p   | miR-365a-3p  | miR-370-3p | miR-374a-5p | miR-422a   | miR-423-5p  | miR-425-5p  | miR-429     | miR-448     | miR-454-3p  | miR-455-3p  | miR-483-3p  | miR-484-3p  |
| miR-328-3p   | miR-331-3p  | miR-339-3p  | miR-339-5p  | miR-340-5p  | miR-342-5p  | miR-342-3p  | miR-345-5p  | miR-34a-5p  | miR-34b-5p  | miR-361-5p | miR-363-3p   | miR-365a-3p  | miR-370-3p | miR-374a-5p | miR-422a   | miR-423-5p  | miR-425-5p  | miR-429     | miR-448     | miR-454-3p  | miR-455-3p  | miR-483-3p  | miR-484-3p  |
| miR-485-3p   | U48         | miR-494-3p  | miR-497-5p  | miR-513a-3p | miR-516b-3p | miR-520a-3p | miR-520d-5p | miR-520f-5p | miR-520i-3p | miR-532-5p | miR-563      | miR-573      | miR-574-3p | miR-575     | miR-582-3p | miR-582-5p  | miR-590-3p  | miR-595     | miR-624-5p  | miR-624-3p  | miR-627-3p  | miR-627-5p  | miR-628-5p  |
| miR-485-3p   | U48         | miR-494-3p  | miR-497-5p  | miR-513a-3p | miR-516b-3p | miR-520a-3p | miR-520d-5p | miR-520f-5p | miR-520i-3p | miR-532-5p | miR-563      | miR-573      | miR-574-3p | miR-575     | miR-582-3p | miR-582-5p  | miR-590-3p  | miR-595     | miR-624-5p  | miR-624-3p  | miR-627-3p  | miR-627-5p  | miR-628-5p  |
| miR-629-5p   | miR-634     | miR-650     | miR-660-5p  | miR-7-2-3p  | miR-765     | miR-766-3p  | miR-769-5p  | miR-9-3p    | miR-9-5p    | miR-92a-3p | miR-92a-1-5p | miR-92a-2-5p | miR-93-3p  | miR-95-3p   | miR-96-3p  | miR-98-5p   | miR-99a-5p  | miR-16-5p   | miR-142-5p  | miR-20a-5p  | miR-30e-3p  | miR-486-5p  | BLANK       |
| miR-629-5p   | miR-634     | miR-650     | miR-660-5p  | miR-7-2-3p  | miR-765     | miR-766-3p  | miR-769-5p  | miR-9-3p    | miR-9-5p    | miR-92a-3p | miR-92a-1-5p | miR-92a-2-5p | miR-93-3p  | miR-95-3p   | miR-96-3p  | miR-98-5p   | miR-99a-5p  | miR-16-5p   | miR-142-5p  | miR-20a-5p  | miR-30e-3p  | miR-486-5p  | BLANK       |

POSITIVE CONTROLS

NEGATIVE CONTROL

UPREGULATED

DOWNREGULATED

BOTH UP & DOWN

NO RESULT\*

\*No reported differential expression in B-cell lymphomas and/or cancer (added onto array for miRNA family involvement)

References: See Bueno *et al.*, (2011); Chang *et al.*, (2008); Chiang *et al.*, (2013); Di Lisio *et al.*, (2012); Forte *et al.*, (2012); Imig *et al.*, (2010); Jima *et al.*, (2010); Leucci *et al.*, (2008); Linda *et al.*, (2010); Malumbres *et al.*, (2009); Robertus *et al.*, (2010); Sampson *et al.*, (2007) (Appendix B)
